# Supplementary material for: Psychosocial stress from pre- to post-pandemic times: a latent class growth analysis using data from a German cohort
Source: Research Square preprint supplement (doi:10.21203/rs.3.rs-8196631/v1), 2025-12-30
Supplement: Supplementary file 1 [file 580ee075d1d0d7313169c836.docx]

Supplementary material

Table 1 - Summary tables of the latent growth models

LCGA models:

| Using linear terms of time | loglik | AIC | BIC |
| --- | --- | --- | --- |
| Model 1 class - link linear | -18562.27 | 37136.54 | 37165.77 |
| Model 1 class - link splines 5equidistant | -17883.43 | 35788.85 | 35842.46 |
| Model 1 class - link beta | -17799.24 | 35614.48 | 35653.46 |

| Using linear + quadratic terms of time | loglik | AIC | BIC |
| --- | --- | --- | --- |
| Model 1 class - link beta | -17693.71 | 35411.42 | 35469.90 |

| Using linear + quadratic + cubic terms of time | loglik | AIC | BIC |
| --- | --- | --- | --- |
| Model 1 class - link linear; | -18411.29 | 36852.17 | 36925.67 |
| Model 1 class - link splines 5equidistant; | -17718.56 | 35477.12 | 35574.59 |
| Model 1 class - link beta; | -17632.39 | 35298.78 | 35381.63 |

|  | loglik | AIC | BIC | Adjusted BIC | entropy | % Class1 | % Class2 | % Class3 | % Class4 | % Class5 | % Class6 |
| --- | --- | --- | --- | --- | --- | --- | --- | --- | --- | --- | --- |
| Model 1 class | -17632.39 | 35298.78 | 35381.63 | 35327.63 | 1.00 | 100 |  |  |  |  |  |
| Model 2 class | -17623.07 | 35290.13 | 35397.34 | 35327.47 | 0.98 | 0.62 | 99.38 |  |  |  |  |
| Model 3 class | -17621.22 | 35296.43 | 35428.01 | 35342.26 | 0.61 | 11.08 | 62.73 | 26.19 |  |  |  |
| Model 4 class | -17607.49 | 35278.97 | 35434.92 | 35333.28 | 0.63 | 9.52 | 58.28 | 2.80 | 29.88 |  |  |
| Model 5 class | -17596.15 | 35266.31 | 35446.62 | 35329.11 | 0.68 | 0.31 | 9.73 | 3.00 | 57.25 | 29.71 |  |
| Model 6 class | Did not converged | | | | | | | | | | |
| Model 7 class | Did not converged | | | | | | | | | | |

Alternative model with 5 classes is too small: <2% are not recommended to present/analyse

>> Best option regarding statistics and theory/literature background is the model with 4 classes

Table 2 - Posterior probabilities

|  | Class 1 | Class 2 | Class 3 | Class 4 |
| --- | --- | --- | --- | --- |
| N | 92 | 27 | 563 | 284 |
| % | 9.52 | 2.8 | 58.28 | 29.4 |
|  |  |  |  |  |
| Posterior classification table: | | | | |
| --> mean of posterior probabilities in each class | | | | |
|  | Prob1 | Prob2 | Prob3 | Prob4 |
| Class 1 | 0.7961 | 0.0045 | 0.1992 | 0.0002 |
| Class 2 | 0.0065 | 0.7021 | 0.1764 | 0.1150 |
| Class 3 | 0.0599 | 0.0372 | 0.7855 | 0.1174 |
| Class 4 | 0.0001 | 0.0220 | 0.1579 | 0.8200 |
|  |  |  |  |  |
| Posterior probabilities above a threshold (%): | | | | |
|  | Class 1 | Class 2 | Class 3 | Class 4 |
| Prob > 0.7 | 72.83 | 48.15 | 73.36 | 75.00 |
| Prob > 0.8 | 54.35 | 40.74 | 55.06 | 64.44 |
| Prob > 0.9 | 32.61 | 18.52 | 25.93 | 45.42 |


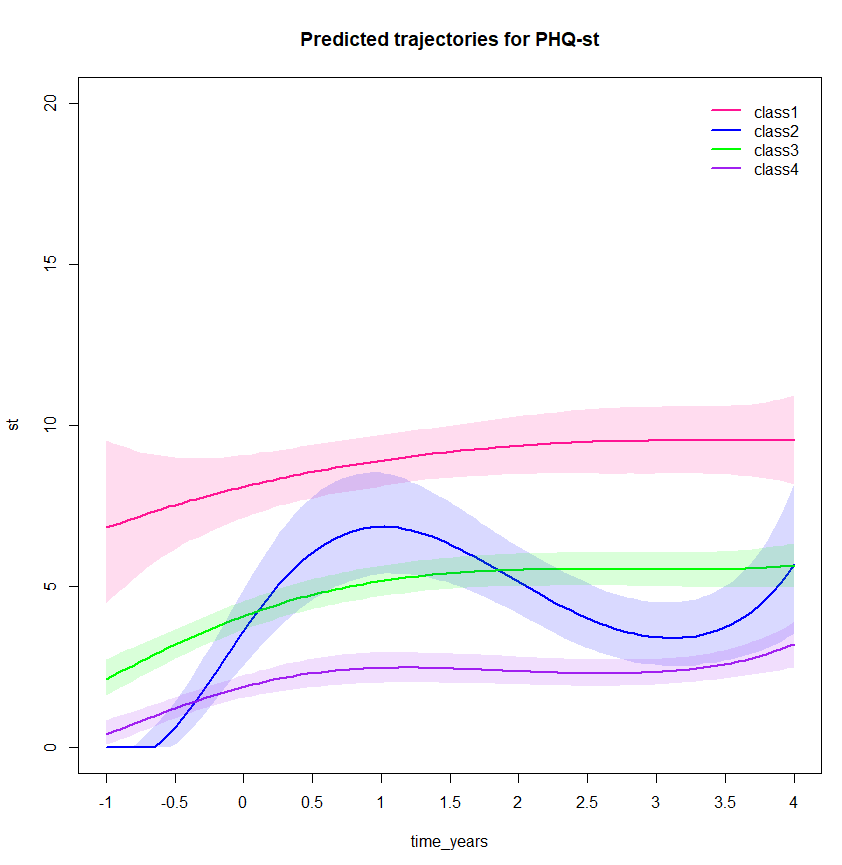


Figure 1 - Plot of the 4 latent classes’ model (chosen model). Time zero = 31.12.2019


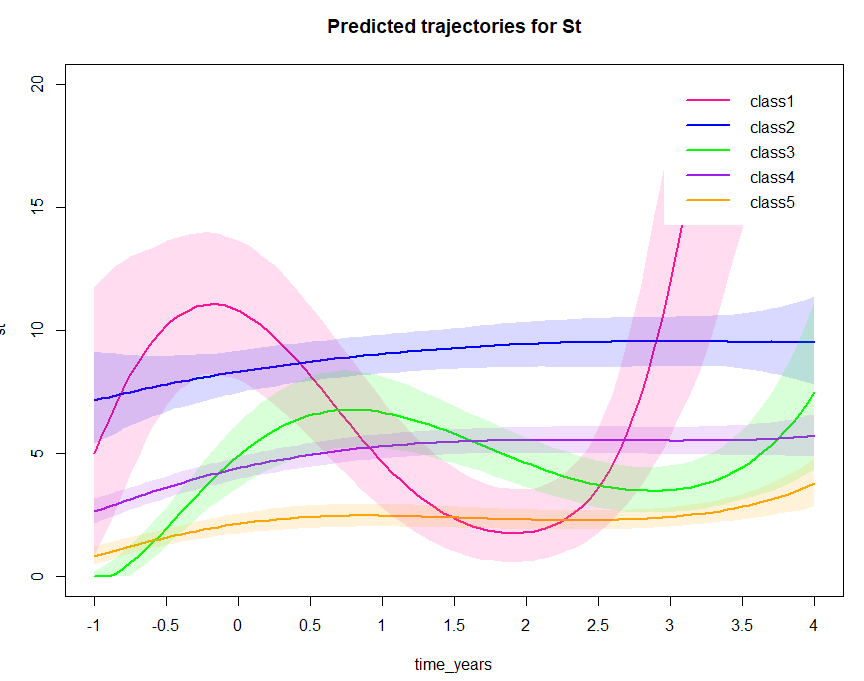


Figure 2 - Plot of the 5 latent classes’ model (alternative model). Time zero = 31.12.2019

**Extra information on covariates**

| **Covariates** | **time point** |
| --- | --- |
| Sex | Baseline |
| Age | Baseline |
| German as one mother tongue | Baseline |
| Early childhood trauma (CTS) | Baseline |
| Personality traits (Big 5) | Baseline |
| international social-economic index of occupation status (ISEI) | Baseline |
| Monthly household net income | Baseline |
| Marital Status | Baseline + FU1 |
| Relationship Status | Baseline + FU1 |
| Household members | Baseline + FU1 |
| Housing structure | CO1 |
| Employment Status | Baseline + FU1+CO1 |
| Occupation | Baseline + FU1 |
| Education (ISCED97) | Baseline + FU1 |
| Anxiety symptoms (GAD-7), | Baseline + FU1+CO1 |
| Depressive symptoms (PHQ-9) | Baseline + FU1+CO1 |
| Health-related quality of life (SF36 - 1 item), | Baseline + FU1+CO1 |
| Diagnosed Anxiety/panic attack | Baseline + FU1 |
| Diagnosed Depression | Baseline + FU1 |
| Body mass index (BMI) | Baseline + FU1 |
| Life satisfaction (L-1) | Baseline + FU1+CO1 |
| Quality of sleep (PSQI) | Baseline |
| Loneliness | CO1 |
| Behavioural changes | CO1 |
| Household financial strain | CO1 |
| Number of fears | CO1 |

We considered month and year of birth, sex, mother tongue, early childhood trauma (assessed by the childhood trauma screener) (38) and personality traits (assessed by the big 5 inventory) (37) as time-invariant variables, and those were collected at baseline examination.

At both baseline and follow-up examination, participants were inquired about their marital status (single, married living together, married living apart, divorced, and widowed) and relationship status (living with a long-term-partner, having a long-term partner not living together or not having a long-term partner). The assessments also included questions on employment status (employed, unemployed, non-working person), and current occupation. For occupation, categories included student, pensioner, permanently unable to work, housewife/househusband or other. Educational background was estimated based on the highest level of formal education and the vocational training, classified according to the International Standard Classification of Education (ISCED 2011) (39). From baseline, a variable indicating the international social-economic index of occupation status (ISEI) (40, 41) was available and we included it in our analysis. As well as for the variable Social Network Index, which derives from marital status, contact with family and friends, and group memberships, and scores from 1 to 4, with 1 indicating social isolation(1,2).

Housing situation was also assessed through questions on number of household members aged fourteen years or older, number of children under that age, and monthly net household income. These questions were formulated differently at baseline, FU1 and CO1: all were available for baseline, for FU1 only the number of member, and for CO1 the possible answers were about the household structure (people living alone, couples without children in the household, couples with minor child(ren) in the household, couples with adult child(ren) in the household, single parents, or other multi-person households).

Anxiety symptoms were measured by the Generalised Anxiety Disorder-7 (GAD-7) screener, which is a seven-item scale measuring symptom severity on a scale from ‘Not at all’ (0) to ‘Nearly every day’ (3), obtaining a score ranging from 0 to 21, with higher scores indicating higher anxiety (42). Depressive symptoms were assessed by the Patient Health Questionnaire-9 (PHQ-9), using the same 0–3 scale as the GAD-7 but for nine items, for a total score ranging from 0 to 27 (43).

Health-related quality of life was assessed using a single item from the 36-Item Short Form Survey (SF-36), where responses ranged from 1 (excellent) to 5 (poor), with intermediate options of 2 (very good), 3 (good), and 4 (fair) (44).

Participants also reported previous diagnoses of mental disorders by a physician (depression and anxiety or panic attacks) at baseline and FU1. For the first follow-up, we combined the variables from those two examinations and reported as an ‘ever diagnosed’ until then.

Height and weight were recorded at the study centre, and the body mass index (BMI) was determined by dividing the weight in kilograms by the height in meters squared, and then categorized according to WHO criteria (45).

One question about life satisfaction was also included, the general life satisfaction short scale (L-1), ‘How satisfied are you currently, all in all, with your life?’, which is a 11-point rating scale from 1 ‘not at all satisfied’ to 11 ‘completely satisfied’ (46).

We included one variable from the Pittsburgh Sleep Quality Index (PSQI): the item assessing subjective sleep quality at baseline (47).

In the first corona questionnaire (CO1), new questions were introduced regarding the pandemic and its impact, including changes in behaviours and broader effects on participants' lives. In CO1, participants responded about their household’s financial situation in terms of their ability to meet expenses. Responses were categorized as: ‘easy’, ‘reasonably easy’, ‘with some difficulties’, and ‘with great difficulty’.

Regarding changes in activities, questions focused on various aspects of daily life, such as household activities, seated activities, mobility (getting around), sports, and leisure activities. Participants were asked to rate these activities on a scale from: ‘much less than before’, ‘slightly less than before’, ‘remained the same’, ‘a little more than before’, to ‘much more than before’.

We included the loneliness score, measured by a 3 items scale about companionship missing, being left out, socially isolated, where 1 means ‘rarely or never’, 2 ‘sometimes’, and 3 ‘often’, leading to a score from 3 to 9, higher scores indicating greater loneliness (48). The sum of fears reported in CO 1 also considered in the analysis, ranging from 0 to 8, fears included (road traffic accident, natural disaster, corona-virus infection, cancer, stroke, heart attack, diabetes mellitus, hereditary disease).

We transformed most of the categorical variables into 2 categories variables to address the reduced number of participants in some categories and to facilitate interpretation.

Rather than building a model using only the most recent covariates, we chose to test models progressively: first with baseline variables alone, then adding FU1 and CO1 assessments. This stepwise approach lets us first assess associations using baseline covariates, then examine how adding FU1 and CO1 measures changes the associations, while preserving temporal clarity.

1. Berkman LF, Syme SL. Social networks, host resistance, and mortality: a nine-year follow-up study of Alameda County residents. American journal of epidemiology. 1979;109(2):186-204.

2. Vonneilich N, Becher H, Bohn B, Brandes B, Castell S, Deckert A, et al. Associations of Migration, Socioeconomic Position and Social Relations With Depressive Symptoms – Analyses of the German National Cohort Baseline Data. International Journal of Public Health. 2023;Volume 68 - 2023.

Table 4 - Number of measurements per participant

| Total number of PHQ-st measurements | Participants | |
| --- | --- | --- |
| N | % |
| 4 | 45 | 4,7 |
| 5 | 49 | 5,1 |
| 6 | 55 | 5,7 |
| 7 | 80 | 8,3 |
| 8 | 124 | 12,8 |
| 9 | 210 | 21,7 |
| 10 | 403 | 41,7 |
| Total | 966 | 100 |


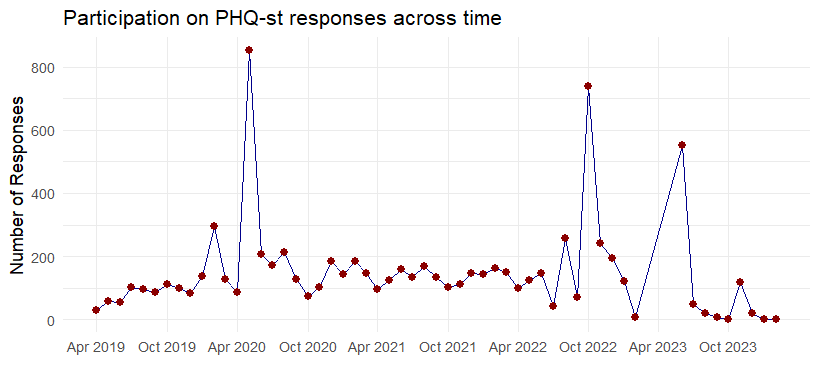


Figure 3 - PHQ-st measurements across time

Table 5a – Mean and Standard Deviation of Participant Characteristics not included in the paper, by PHQ-Stress Trajectory Class (Numeric Covariates)

| PHQ-st trajectories’ classes | 1: High | 2: Peak-recovery | 3: Intermediate | 4: Low |
| --- | --- | --- | --- | --- |
| Participants, n (%) | 92 (9.6) | 27 (2.8) | 559 (58.2) | 283 (29.4) |
| Social network index at baseline, mean (SD) | 2.27 (0.71) | 2.41 (0.64) | 2.37 (0.75) | 2.42 (0.74) |
| Average monthly net household income at baseline, mean (SD) | 1774.26 (1042.49) | 2519.43 (1352.36) | 2029.75 (1227.15) | 2244.98 (1373.50) |
| Subjective quality of sleep (PSQI), mean (SD) | 2.47 (0.73) | 2.15 (0.53) | 2.12 (0.60) | 1.90 (0.58) |
| Number of children under 14y in the household at baseline, mean (SD) | 2.55 (1.05) | 2.74 (1.06) | 2.37 (1.09) | 2.26 (1.01) |
| Number of children under 14y in the household at FU1, mean (SD) | 0.40 (0.73) | 0.41 (0.69) | 0.33 (0.68) | 0.23 (0.63) |
| Social network index: 1 ‘social isolation’ to 4;  PSQI: 1 ‘very good’ to 4 ’very bad’ | | | | |

Table 5b – Participant Characteristics not included in the paper, by PHQ-Stress Trajectory Class (Frequencies and Percentages for Categorical Variables)

| PHQ-st trajectories’ classes | 1: High | 2: Peak-recovery | 3: Intermediate | 4: Low |
| --- | --- | --- | --- | --- |
|
| Expected participants, n (%) | 92 (9.6) | 27 (2.8) | 559 (58.2) | 283 (29.4) |
| German language proficiency | | | | |
| German as mother tongue | 88 (95.7) | 23 (85.2) | 545 (97.5) | 278 (98.2) |
| German and other language(s) as mother tongue | 1 (1.1) | 2 (7.4) | 2 (0.4) | 1 (0.4) |
| Mother tongue not German, very good knowledge of German | 1 (1.1) | 1 (3.7) | 10 (1.8) | 4 (1.4) |
| Mother tongue not German, good knowledge of German | 1 (1.1) | 0 (0.0) | 1 (0.2) | 0 (0.0) |
| Mother tongue not German, mediocre German language skills | 1 (1.1) | 1 (3.7) | 1 (0.2) | 0 (0.0) |
| Mother tongue not German, poor German language skills | 0 (0.0) | 0 (0.0) | 0 (0.0) | 0 (0.0) |
| Mother tongue not German, very poor knowledge of German | 0 (0.0) | 0 (0.0) | 0 (0.0) | 0 (0.0) |
| Marital Status at baseline | | | | |
| Married, n (%) | 45 (48.9) | 16 (59.3) | 302 (54.0) | 187 (66.1) |
| Married, living apart from spouse, n (%) | 2 (2.2) | 0 (0.0) | 9 (1.6) | 5 (1.8) |
| Single, n (%) | 34 (37.0) | 4 (14.8) | 170 (30.4) | 48 (17.0) |
| Divorced, n (%) | 10 (10.9) | 7 (25.9) | 65 (11.6) | 26 (10.2) |
| Widowed, n (%) | 1 (1.1) | 0 (0.0) | 13 (2.3) | 17 (16.0) |
| Relationship status at baseline | | | | |
| Living with (spouse) partner, n (%) | 66 (69,6) | 20 (74.1) | 382 (68.3) | 214 (75.6) |
| Not living with (spouse) partner, n (%) | 10 (10.9) | 4 (14.8) | 68 (12.2) | 23 (8.1) |
| No partner, n (%) | 18 (19.6) | 3 (11.1) | 109 (19.5) | 46 (16.3) |
| Ever diagnosed with Depression until baseline | | | | |
| no, n (%) | 56 (60.9) | 24 (88.9) | 478 (85.5) | 259 (91.5) |
| yes, n (%) | 36 (39.1) | 3 (11.1) | 81 (14.5) | 24 ( 8.5) |
| Ever diagnosed with Anxiety/Panic attack until baseline | | | | |
| no, n (%) | 82 (89.1) | 26 (96.3) | 504 (90.2) | 267 (94.3) |
| yes, n (%) | 10 (10.9) | 1 (3.7) | 55 ( 9.8) | 16 ( 5.7) |
| Body Mass Index at baseline | | | | |
| under-/normal-weight (< 25kg/m2), n (%) | 42 (45.7) | 12 (44.4) | 252 (45.1) | 147 (51.9) |
| overweight/obesity (≥25kg/m2), n (%) | 50 (54.3) | 15 (55.6) | 307 (54.9) | 136 (48.1) |
| Impact of COVID-19 pandemic on activity in the household (e.g. washing the dishes, cleaning, cooking) | | | | |
| Much less than before, n (%) | 1 (1.1) | 0 (0.0) | 2 (0.4) | 2 (0.7) |
| Slightly less than before, n (%) | 3 (3.3) | 2 (7.4) | 20 (3.6) | 3 (1.1) |
| Remained the same, n (%) | 53 (58.2) | 14 (51.9) | 390 (70.1) | 231 (81.6) |
| A little more than before, n (%) | 27 (29.7) | 9 (33.3) | 110 (19.8) | 43 (15.2) |
| Much more than before, n (%) | 7 (7.7) | 2 (7.4) | 34 (6.1) | 4 (1.4) |
| Impact of COVID-19 pandemic on activity in leisure time (e.g. walking, gardening) | | | | |
| Much less than before, n (%) | 10 (11.0) | 2 ( 7.4) | 39 ( 7.0) | 10 ( 3.5) |
| Slightly less than before, n (%) | 17 (18.7) | 5 ( 18.5) | 100 (18.0) | 36 (12.7) |
| Remained the same, n (%) | 36 (39.6) | 12 ( 44.4) | 234 (42.1) | 160 (56.5) |
| A little more than before, n (%) | 22 (24.2) | 6 ( 22.2) | 140 (25.2) | 63 (22.3) |
| Much more than before, n (%) | 6 ( 6.6) | 2 (7.4) | 43 ( 7.7) | 14 ( 4.9) |
| Impact of COVID-19 pandemic on activity for getting around (e.g. walking, cycling to work/shopping) | | | | |
| Much less than before, n (%) | 11 (12.1) | 5 (18.5) | 53 ( 9.5) | 18 ( 6.4) |
| Slightly less than before, n (%) | 19 (20.9) | 5 (18.5) | 117 (21.0) | 36 (12.7) |
| Remained the same, n (%) | 42 (46.2) | 11 (40.7) | 295 (53.1) | 186 (65.7) |
| A little more than before, n (%) | 18 (19.8) | 5 (18.5) | 77 (13.8) | 36 (12.7) |
| Much more than before, n (%) | 1 ( 1.1) | 1 ( 3.7) | 14 ( 2.5) | 7 ( 2.5) |
| Impact of COVID-19 pandemic on seated activities | | | | |
| Much less than before, n (%) | 2 ( 2.2) | 1 ( 3.7) | 6 ( 1.1) | 1 ( 0.4) |
| Slightly less than before, n (%) | 5 ( 5.5) | 2 ( 7.4) | 24 ( 4.3) | 10 ( 3.5) |
| Remained the same, n (%) | 51 (56.0) | 17 ( 63.0) | 358 (64.4) | 214 (75.6) |
| A little more than before, n (%) | 23 (25.3) | 4 ( 14.8) | 140 (25.2) | 51 (18.0) |
| Much more than before, n (%) | 10 (11.0) | 3 ( 11.1) | 28 ( 5.0) | 7 ( 2.5) |
| Impact of COVID-19 pandemic on physical Activity at work (also at the Home Office) | | | | |
| Much less than before, n (%) | 11 (12.2) | 4 (14.8) | 74 (13.3) | 20 (7.1) |
| Slightly less than before, n (%) | 18 (20.0) | 8 ( 29.6) | 135 (24.3) | 42 (14.9) |
| Remained the same, n (%) | 53 (58.9) | 15 ( 55.6) | 313 (56.3) | 203 (72.0) |
| A little more than before, n (%) | 6 (6.7) | 0 (0.0) | 30 (5.4) | 14 (5.0) |
| Much more than before, n (%) | 2 (2.2) | 0 (0.0) | 4 (0.7) | 3 (1.1) |

Multinomial logistic regression

- univariable

**Univariable models**

Table 6 – Odds ratios and 95% confidence intervals from **univariable multinomial logistic** regression comparing membership in the consistently lower scores latent class with other classes associated with **time-invariant covariates (not included in the paper)**

| Expected participants | (n=92, 9.6%) | (n=27, 2.8%) | (n=559, 58.2%) | (n= 283, 29.4%) |
| --- | --- | --- | --- | --- |
| PHQ-st trajectories’ classes  Covariates (missing values) | 1: High | 2: Peak-recovery | 3: Intermediate | 4: Low |
| OR [95% CI] | | | |
| Female sex (ref = Male sex) (0) | 2.30 [1.41, 3.75] | 1.32 [0.60, 2.92] | 1.54 [1.16, 2.05] | Ref |
| Age in January 2019a | 0.95 [0.93, 0.96] | 0.95 [0.92, 0.98] | 0.96 [0.95, 0.98] | Ref |
| BIG 5 Agreeableness score (0) | 0.51 [0.40, 0.66] | 0.47 [0.32, 0.70] | 0.74 [0.63, 0.87] | Ref |
| BIG 5 Neuroticism score (0) | 2.99 [2.42, 3.69] | 1.51 [1.10, 2.06] | 1.53 [1.35, 1.73] | Ref |
| BIG 5 Extraversion score (0) | 0.83 [0.69, 0.99] | 1.02 [0.75, 1.39] | 0.95 [0.85, 1.07] | Ref |
| BIG 5 Consciousness score (0) | 0.76 [0.58, 0.98] | 1.14 [0.70, 1.86] | 0.78 [0.66, 0.92] | Ref |
| BIG 5 Openness score (0) | 0.94 [078, 1.13] | 1.20 [0.86, 1.66] | 0.96 [0.86, 1.07] | Ref |
| Childhood trauma score (CTS) (0) | 1.22 [1.12, 1.34] | 1.17 [1.01, 1.36] | 1.05 [0.97, 1.12] | Ref |
| German as mother tongue (0): Yes (Ref =No) | 0.43 [0.09, 1.94] | 0.18 [0.03, 1.03] | 0.65 [0.21, 2.04] | Ref |
| a calculated from month and year of birth collected at baseline | | | | |

Table 7 - Odds ratios and 95% confidence intervals from **univariable multinomial logistic regression** comparing membership in the consistently lower scores latent class with other classes associated with time-variant covariates at **BASELINE (not included in the paper)**

| Expected participants | (n=92, 9.6%) | (n=27, 2.8%) | (n=559, 58.2%) | (n= 283, 29.4%) |
| --- | --- | --- | --- | --- |
| PHQ-st trajectories’ classes  Covariates (missing values) | 1: High | 2: Peak-recovery | 3: Intermediate | 4: Low |
| OR [95% CI] | | | |
| Social network index (SNI) (0) | 0.77 [0.56, 1.05] | 0.98 [0.57, 1.68] | 0.92 [0.76, 1.11] | Ref |
| Number of children under 14 in the household (0) | 1.39 [1.01, 1.92] | 1.86 [1.20, 2.89] | 1.23 [0.99, 1.53] | Ref |
| Number of people in the household (0) | 1.29 [1.04, 1.60] | 1.49 [1.06, 2.09] | 1.11 [0.97, 1.28] | Ref |
| Monthly household net income (1 unit = 100€) (0) | 0.96 [0.94, 0.99] | 1.01 [0.99, 1.03] | 0.99 [0.98, 1.00] | Ref |
| International socio-economic index (0) | 0.97 [0.96, 0.99] | 0.98 [0.96, 1.01] | 1.00 [0.99, 1.01] | Ref |
| Employment status (ref= employed) (1) |  |  |  |  |
| Unemployed | 1.03 [0.27, 4.00] | 0.00 [0.00, Inf] | 1.00 [0.46, 2.51] | Ref |
| Non-working person | 0.49 [0.24, 1.01] | 0.31 [0.07, 1.35] | 0.73 [0.50, 1.05] | Ref |
| Education years (ISCED97) (0) | 0.93 [0.83, 1.04] | 0.85 [0.71, 1.03] | 0.99 [0.49, 1.05] | Ref |
| Subjective sleep quality (PSQI - 1 item) (0) | 4.47 [3.01, 6.64] | 2.04 [1.06, 3.92] | 1.90 [1.48, 2.44] | Ref |
| Health-related quality of life (SF36 - 1 item) (0) | 4.43 [2.96, 6.65] | 1.99 [1.05, 3.74] | 1.64 [1.31, 2.05] | Ref |
| Life satisfaction (L-1) (0) | 0.53 [0.46, 0.61] | 0.82 [0.62, 1.08] | 0.71 [0.64, 0.80] | Ref |
| Psychosocial stress (PHQ-st) | 2.45 [2.17, 2.77] | 1.26 [1.02, 1.56] | 1.63 [1.48, 1.79] | Ref |
| Depressive symptoms score (PHQ-9) (0) | 1.77 [1.61, 1.94] | 1.23 [1.04, 1.46] | 1.37 [1.27, 1.48] | Ref |
| Anxiety symptoms score (GAD-7) (0) | 1.84 [1.67, 2.04] | 1.37 [1.16, 1.62] | 1.41 [1.30, 1.53] | Ref |
| Divorced (0): Yes (Ref = No) | 1.21 [0.56, 2.60] | 3.46 [1.34, 8.95] | 1.30 [0.81, 2.10] | Ref |
| Not having a partner (0): Yes (Ref = No) | 1.25 [0.68, 2.29] | 0.64 [0.19, 2.23] | 1.25 [0.85, 1.82] | Ref |
| Married living together (0): Yes (Ref = No) | 0.49 [0.30, 0.79] | 0.75 [0.33, 1.67] | 0.60 [0.45, 0.81] | Ref |
| Ever diagnosed with Anxiety/Panic attack (0): Yes (Ref = No) | 2.34 [1.00, 5.46] | 0.73 [0.09, 5.83] | 1.56 [0.84, 2.90] | Ref |
| Ever diagnosed with Depression (0): Yes (Ref = No) | 5.74 [3.07, 10.73] | 1.00 [0.22, 4.51] | 1.73 [1.04, 2.88] | Ref |
| BMI (0): ≥25kg/m2 (Ref = <25kg/m2) | 1.29 [0.80, 2.06] | 1.35 [0.61, 2.99] | 1.32 [0.99, 1.75] | Ref |
| Abbreviations: BMI, body mass index; GAD-7, the Generalised Anxiety Disorder-7 screener; kg, kilogram; n, number of participants; m, meter; PHQ-9, the Patient Health Questionnaire; PHQ-st, the Patient Health Questionnaire - stress module; ref, reference;  Scores ranges:  Ascending order: GAD-7: 0 to 21; L-1: 1 to 11; PHQ-9: 0 to 27; PHQ-st: 0 to 20; SNI: 1 ‘social isolation’ to 4;  Descending order: SF36-1 item: 1 (excellent) to 5 (poor)  BMI: <25kg/m2 : under-/normal-weight: , ≥25kg/m2: overweight/obesity | | | | |

Table 8 – Odds ratios and 95% confidence intervals from **univariable multinomial logistic regression** comparing membership in the consistently lower scores latent class with other classes associated with time-variant covariates from **FU1 (not included in the paper)**

| Expected participants | (n=92, 9.6%) | (n=27, 2.8%) | (n=559, 58.2%) | (n= 283, 29.4%) |
| --- | --- | --- | --- | --- |
| PHQ-st trajectories’ classes  Covariates (missing values) | 1: High | 2: Peak-recovery | 3: Intermediate | 4: Low |
| OR [95% CI] | | | |
| Number of children under 14y in the household (0) | 1.49 [1.06, 2.09] | 1.50 [0.88, 2.56] | 1.30 [1.03, 1.65] | Ref |
| Education years (ISCED97) (0) | 0.94 [0.84, 1.06] | 0.84 [0.70, 1.02] | 1.00 [0.94, 1.08] | Ref |
| Married living together (0): Yes (Ref = No) | 0.49 [0.30, 0.79] | 0.75 [0.33, 1.67] | 0.60 [0.45, 0.81] | Ref |
| Not having a partner (0): Yes (Ref = No) | 1.39 [0.76, 2.57] | 1.30 [0.46, 3.63] | 1.20 [0.81, 1.79] | Ref |
| Divorced (0): Yes (Ref = No) | 1.31 [0.64, 2.69] | 3.07 [1.19, 7.87] | 1.13 [0.71, 1.80] | Ref |
| Employed at FU1 (36): Yes (Ref = No) | 4.09 [2.12, 7.87] | 7.71 [1.79, 33.34] | 1.83 [1.35, 2.48] | Ref |
| Ever diagnosed with Anxiety/Panic attack (0): Yes (Ref = No) | 3.78 [1.82, 7.84] | 0.64 [0.08, 5.04] | 1.82 [1.02, 3.24] | Ref |
| Ever diagnosed with Depression (0): Yes (Ref = No) | 6.94 [3.84, 12.54] | 1.35 [0.38, 4.81] | 1.83 [1.13, 2.96] | Ref |
| Depressive symptoms score (PHQ-9) (0) | 2.29 [2.04, 2.57] | 1.50 [1.25, 1.80] | 1.64 [1.50, 1.80] | Ref |
| Anxiety symptoms score (GAD-7) (0) | 2.54 [2.23, 2.90] | 1.49 [1.21, 1.83] | 1.71 [1.54, 1.89] | Ref |
| Health-related quality of life (SF36 - 1 item) (0) | 5.81 [3.81, 8.85] | 0.93 [0.51, 1.69] | 1.89 [1.50, 2.38] | Ref |
| Life satisfaction (L-1) (0) | 0.42 [0.36, 0.50] | 0.59 [0.45, 0.78] | 0.59 [0.51, 0.68] | Ref |
| BMI (0): ≥25kg/m2 (Ref = <25kg/m2) | 1.48 [0.92, 2.39] | 1.18 [0.54, 2.63] | 1.35 [1.01, 1.80] | Ref |
| Abbreviations: BMI, body mass index; FU1, 1st follow-up examination; GAD-7, the Generalised Anxiety Disorder-7 screener; kg, kilogram; n, number of participants; m, meter; PHQ-9, the Patient Health Questionnaire; PHQ-st, the Patient Health Questionnaire - stress module; ref, reference;  Scores ranges:  Ascending order: GAD-7: 0 to 21; L-1: 1 to 11; PHQ-9: 0 to 27; PHQ-st: 0 to 20;  Descending order: SF36-1 item: 1 (excellent) to 5 (poor)  BMI: <25kg/m2 : under-/normal-weight: , ≥25kg/m2: overweight/obesity | | | | |

Table 9 – Odds ratios and 95% confidence intervals from **univariable multinomial logistic** regression comparing membership in the consistently lower scores latent class with other classes associated with time-variant covariates from **CO1 (not included in the paper)**

| Expected participants | (n=92, 9.6%) | (n=27, 2.8%) | (n=559, 58.2%) | (n= 283, 29.4%) |
| --- | --- | --- | --- | --- |
| PHQ-st trajectories’ classes  Covariates (missing values) | 1: High | 2: Peak-recovery | 3: Intermediate | 4: Low |
| OR [95% CI] | | | |
| Number of fears (0) | 1.46 [1.32, 1.62] | 1.12 [0.94, 1.34] | 1.18 [1.10, 1.26] | Ref |
| Loneliness score (0) | 1.86 [1.58, 2.18] | 1.40 [1.08, 1.82] | 1.25 [1.12, 1.39] | Ref |
| Employment (5): Yes (Ref = No) | 2.98 [1.65, 5.38] | 7.94 [1.84, 34.19] | 1.90 [1.40, 2.59] | Ref |
| Single parent (ref= others forms) (4) | 4.05 [1.06, 15.43] | 5.58 [0.97, 31.98] | 2.20 [0.73, 6.60] | Ref |
| Living with partner and young child(ren) (ref= others forms) (4) | 2.17 [1.24, 3.82] | 3.38 [1.45, 7.87] | 1.65 [1.12, 2.42] | Ref |
| Household finances difficulties at CO1 (ref = no difficulties) (4) | 7.03 [3.38, 14.58] | 2.60 [0.69, 9.75] | 2.37 [1.28, 4.41] | Ref |
| Increased activities in the household (ref = no change or increased) (4) | 3.00 [1.77, 5.08] | 3.45 [1.51, 7.91] | 1.76 [1.22, 2.53] | Ref |
| Increased seated activities (ref = no change or increased) (4) | 2.21 [1.32, 3.70] | 1.36 [0.55, 3.37] | 1.68 [1.19, 2.36] | Ref |
| Decreased sport activities (ref = no change or increased) (4) | 1.83 [1.14, 2.95] | 2.29 [1.02, 5.11] | 1.38 [1.03, 1.85] | Ref |
| Decreased activities getting around (ref = no change or increased) (4) | 2.09 [1.23, 3.54] | 2.49 [1.08, 5.75] | 1.87 [1.32, 2.64] | Ref |
| Decreased leisure activities (ref = no change or increased) (4) | 2.17 [1.25, 3.76] | 1.80 [0.72, 4.51] | 1.72 [1.19, 2.48] | Ref |
| Decreased sport activities (ref = no change or increased) (4) | 1.83 [1.14, 2.95] | 2.29 [1.02, 5.11] | 1.38 [1.03, 1.85] | Ref |
| Abbreviations: CO1, 1st Corona questionnaire;  Scores ranges: Loneliness: 3 to 9; number of fears at CO1: 0 to 8 | | | | |

**Multivariable models**

Model 1 including:

time-invariant variables from Baseline + time-variant variables from Baseline, pre-selected based on literature **(Table 10)**

Model 2 including:

time-invariant variables from Baseline + time-variant variables from FU1, pre-selected based on literature **(Table 12)**

Model 3 including:

time-invariant variables from Baseline + time-variant variables from FU1 + CO1, pre-selected based on literature **(Table 14)**

Model 1 post-selection:

**Table 11** of the supplement

Nagelkerke’s R2 = 0.455

Model 2 post-selection:

**Table 13** of the supplement

Nagelkerke’s R2 = 0.588

>> **Final model** (3 post-selection) to be presented and discussed:

**Table 3** of the paper

Nagelkerke’s R2 = 0.594

Table 10 - Odds ratios and 95% confidence intervals from **multivariable multinomial logistic regression** comparing membership in the consistently lower scores latent class with other classes associated with covariates from the **baseline – before selection**

| PHQ-st trajectories’ classes  Covariate | 1: High  (n=92, 9.6%) | 2: Peak-recovery  (n=27, 2.8%) | 3: Intermediate (n=559, 58.2%) | 4: Low (n= 282, 29.4%) |
| --- | --- | --- | --- | --- |
| OR [95% CI] | | | |
| Female sex (ref = Male sex) | 1.82 [0.89, 3.71] | 1.95 [0.69, 5.56] | 1.47 [1.02, 2.12] | Ref |
| Age in January 2019a | 0.91 [0.87, 0.94] | 0.88 [0.82, 0.93] | 0.94 [0.92, 0.96] | Ref |
| BIG 5 Neuroticism score | 1.59 [1.17, 2.16] | 1.23 [0.80, 1.89] | 1.11 [0.94, 1.30] | Ref |
| BIG 5 Agreeableness score | 0.65 [0.46, 0.91] | 0.43 [0.26, 0.70] | 0.84 [0.69, 1.02] | Ref |
| BIG 5 Extraversion score | 1.05 [0.81, 1.37] | 0.75 [0.51, 1.11] | 1.04 [0.90, 1.21] | Ref |
| BIG 5 Consciousness score | 1.14 [0.79, 1.64] | 1.76 [0.96, 3.22] | 1.10 [0.89, 1.36] | Ref |
| BIG 5 Openness score | 0.92 [0.70, 1.22] | 1.65 [1.08, 2.53] | 0.98 [0.84, 1.14] | Ref |
| Childhood trauma score (CTS) | 1.17 [1.02, 1.34] | 1.19 [1.00, 1,43] | 1.04 [0.96, 1.13] | Ref |
| German as mother tongue: Yes (Ref = No) | 0.15 [0.02, 1.10] | 0.15 [0.02, 1.55] | 0.42 [0.12, 1.48] | Ref |
| Education in years (ISCED97) | 1.15 [0.95, 1.40] | 0.86 [0.66, 1.13] | 1.02 [0.92, 1.14] | Ref |
| Monthly household net income (1 unit = 100€) | 1.01 [0.98, 1.04] | 1.04 [1.00, 1.07] | 0.99 [0.98, 1.01] | Ref |
| International socio-economic index | 0.99 [0.96, 1.02] | 0.99 [0.96, 1.03] | 1.01 [0.99, 1.02] | Ref |
| Employment status (ref= employed) | | | | |
| Unemployed | 0.37 [0.05, 2.71] | 0.00 [0.00, 0.00] | 0.81 [0.28, 2.34] | Ref |
| Non-working person | 0.93 [0.31, 2.82] | 1.90 [0.30, 11.94] | 1.26 [0.73, 2.18] | Ref |
| Social network index (SNI) | 1.02 [0.60, 1.72] | 1.04 [0.49, 2.20] | 1.16 [0.88, 1.54] | Ref |
| Number of children under 14y in the household | 0.51 [0.26, 1.02] | 1.12 [0.43, 2.93] | 0.71 [0.47, 1.06] | Ref |
| Number of people in the household | 1.51 [0.90, 2.55] | 1.15 [0.53, 2.50] | 1.20 [0.88, 1.63] | Ref |
| Divorced: Yes (Ref = No) | 2.02 [0.60, 6.85] | 29.32 [4.98, 172.67] | 1.96 [1.01, 3.77] | Ref |
| Married living together: Yes (Ref = No) | 0.99 [0.38, 2.57] | 3.00 [0.60, 14.83] | 0.92 [0.54, 1.58] | Ref |
| Not having a partner: Yes (Ref = No) | 0.50 [0.16, 1.58] | 0.33 [0.05, 1.99] | 0.71 [0.39, 1.29] | Ref |
| Subjective sleep quality (PSQI - 1 item) | 1.72 [0.96, 3.07] | 2.16 [0.90, 5.20] | 1.35 [0.98, 1.87] | Ref |
| Health-related quality of life (SF36- 1 item) | 3.05 [1.73, 5.39] | 4.07 [1.73, 9.57] | 1.68 [1.23, 2.31] | Ref |
| Life satisfaction (L-1) | 0.89 [0.71, 1.11] | 0.88 [0.64, 1.22] | 0.91 [0.80, 1.03] | Ref |
| Psychosocial stress (PHQ-st) | 2.07 [1.75, 2.43] | 0.94 [0.70, 1.27] | 1.44 [1.28, 1.61] | Ref |
| Depressive symptoms score (PHQ-9) | 1.12 [0.95, 1.32] | 0.95 [0.72, 1.25] | 1.08 [0.97, 1.21] | Ref |
| Anxiety symptoms score (GAD-7) | 0.93 [0.78, 1.11] | 1.17 [0.90, 1.51] | 0.99 [0.88, 1.12] | Ref |
| Ever diagnosed with Anxiety/Panic attack: Yes (Ref = No) | 0.16 [0.04, 0.67] | 0.26 [0.03, 2.67] | 0.90 [0.41, 1.97] | Ref |
| Ever diagnosed with Depression: Yes (Ref = No) | 1.77 [0.66, 4.74] | 0.60 [0.10, 3.42] | 0.85 [0.44, 1.64] | Ref |
| BMI: ≥25kg/m2 (Ref = <25kg/m2) | 1.16 [0.57, 2.36] | 2.29 [0.84, 6.27] | 1.60 [1.10, 2.33] | Ref |
| a calculated from month and year of birth collected at baseline  Abbreviations: BMI, body mass index; the Generalised Anxiety Disorder-7 screener; kg, kilogram; n, number of participants; m, meter; PHQ-9, the Patient Health Questionnaire; PHQ-st, the Patient Health Questionnaire - stress module; ref, reference;  Scores ranges:   - Ascending order: Big-5: 1 to 7; GAD-7: 0 to 21; number of fears at CO1: 0 to 8; L-1: 1 to 11; Loneliness: 3 to 9; PHQ-9: 0 to 27; PHQ-st: 0 to 20; SNI: 1 ‘social isolation’ to 4; - Descending order: SF36-1 item: 1 (excellent) to 5 (poor)   n (complete cases) = 960 | | | | | |

Table 11 - Odds ratios and 95% confidence intervals from **multinomial logistic regression** comparing membership in the consistently lower scores latent class with other classes associated with covariates from the **baseline – after selection**

|  | PHQ-st trajectories’ classes  Covariate | 1: High (n=92, 9.6%) | 2: Peak-recovery  (n=27, 2.8%) | 3: Intermediate (n=559, 58.2%) | 4: Low (n= 283, 29.4%) |
| --- | --- | --- | --- | --- | --- |
| OR [95% CI | | | |
| Baseline | Age in January 2019a | 0.91 [0.88, 0.94] | 0.90 [0.86, 0.94] | 0.95 [0.94, 0.97] | Ref |
| Divorced | | | | |
| Yes (Ref = No) | 2.23 [0.79, 6.30] | 11.32 [3.60, 35.55] | 1.69 [0.96, 2.96] | Ref |
| Not having a partner | | | | |
| Yes (Ref = No) | 0.45 [0.19, 1.06] | 0.23 [0.06, 0.89] | 0.67 [0.42, 1.06] | Ref |
| Monthly household net income (1 unit = 100€) | 1.00 [0.98, 1.03] | 1.03 [1.00, 1.06] | 0.99 [0.98, 1.01] | Ref |
| Psychosocial stress (PHQ-st) | 2.12 [1.85, 2.43] | 1.06 [0.84, 1.35] | 1.50 [1.36, 1.66] | Ref |
| BIG 5 Neuroticism score | 1.57 [1.20, 2.06] | 1.24 [0.85, 1.79] | 1.12 [0.97, 1.29] | Ref |
| BIG 5 Agreeableness score | 0.66 [0.48, 0.91] | 0.52 [0.34, 0.80] | 0.85 [0.70, 1.02] | Ref |
| Childhood trauma score (CTS) | 1.16 [1.02, 1.32] | 1.22 [1.03, 1.44] | 1.03 [0.95, 1.11] | Ref |
| Ever diagnosed with Anxiety/Panic attack | | | | |
| Yes (Ref = No) | 0.25 [0.07, 0.88] | 0.33 [0.04, 3.00] | 0.94 [0.45, 1.94] | Ref |
| Subjective sleep quality (PSQI - 1 item) | 1.73 [1.03, 2.90] | 1.81 [0.88, 3.71] | 1.40 [1.04, 1.88] | Ref |
| Health-related quality of life (SF36 - 1 item) | 3.25 [1.90, 5.56] | 3.60 [1.60, 8.07] | 1.70 [1.27, 2.28] | Ref |
| a calculated from month and year of birth collected at baseline  Abbreviations: PHQ-st, the Patient Health Questionnaire - stress module; ref, reference;  Scores ranges: Big-5 agreeableness and neuroticism: 1 to 7; PHQ-st: 0 to 20; SF36-1 item: 1 (excellent) to 5 (poor)  Nagelkerke’s R2 = 0.4575; AIC = 1510.416; n (complete cases) = 961 | | | | | |

Table 12 - Odds ratios and 95% confidence intervals from **multinomial logistic regression** comparing membership in the consistently lower scores latent class with other classes associated with covariates from the **Follow-up 1 – before selection**

|  | PHQ-st trajectories’ classes  Covariate | 1: High (n= 85, 9.2%) | 2: Peak-recovery (n= 25, 2.7%) | 3: Intermediate (n= 539, 58.3%) | 4: Low (n= 276, 29.8%) |
| --- | --- | --- | --- | --- | --- |
| OR [95% CI] | | | |
| Baseline | Female sex (ref = Male sex) | 1.29 [0.57, 2.92] | 0.98 [0.35, 2.70] | 1.26 [0.85, 1.88] | Ref |
| Age in January 2019 | 0.96 [0.91, 1.00] | 0.92 [0.86, 0.98] | 0.96 [0.94, 0.98] | Ref |
| PHQ-st at baseline | 1.97 [1.69, 2.30] | 0.95 [0.72, 1.25] | 1.39 [1.25, 1.55] | Ref |
| BIG 5 Neuroticism score | 1.03 [0.73, 1.44] | 1.34 [0.87, 2.05] | 0.91 [0.77, 1.09] | Ref |
| BIG 5 Agreeableness score | 0.75 [0.51, 1.10] | 0.44 [0.27, 0.72] | 0.87 [0.71, 1.07] | Ref |
| BIG 5 Extraversion score | 1.14 [0.85, 1.53] | 0.87 [0.59, 1.29] | 1.05 [0.89, 1.23] | Ref |
| BIG 5 Consciousness score | 1.10 [0.72, 1.68] | 1.70 [0.92, 3.17] | 1.06 [0.85, 1.34] | Ref |
| BIG 5 Openness score | 0.81 [0.59, 1.12] | 1.57 [1.02, 2.40] | 0.95 [0.80, 1.11] | Ref |
| Childhood trauma score (CTS) | 1.13 [0.97, 1.33] | 0.97 [0.92, 1,30] | 1.02 [0.93, 1.12] | Ref |
| German is a mother tongue: Yes (Ref = No) | 0.61 [0.03, 12.31] | 0.17 [0.01, 2.41] | 0.31 [0.08, 1.19] | Ref |
| FU1 | Education in years (ISCED97) | 1.02 [0.84, 1.25] | 0.82 [0.65, 1.03] | 1.01 [0.92, 1.10] | Ref |
| Employment at FU1: Yes (Ref = No) | 5.82 [1.69, 20.02] | 3.13 [0.57, 17.27] | 1.15 [0.69, 1.92] | Ref |
| Divorced: Yes (Ref = No) | 1.89 [0.53, 6.80] | 16.39 [3.56, 75.48] | 1.57 [0.81, 3.04] | Ref |
| Married living together: Yes (Ref = No) | 0.51 [0.19, 1.34] | 4.90 [1.12, 21.41] | 0.76 [0.46, 1.24] | Ref |
| Not having a partner: Yes (Ref = No) | 0.33 [0.11, 1.04] | 0.94 [0.23, 3.85] | 0.58 [0.33, 1.04] | Ref |
| Depressive symptoms score (PHQ-9) | 1.37 [1.14, 1.64] | 1.30 [1.02, 1.66] | 1.24 [1.10, 1.40] | Ref |
| Anxiety symptoms score (GAD-7) | 1.84 [1.51, 2.25] | 1.18 [0.88, 1.58] | 1.39 [1.21, 1.59] | Ref |
| Health-related quality of life (SF36 - 1 item) | 3.45 [1.80, 6.60] | 1.12 [0.48, 2.63] | 1.85 [1.31, 2.63] | Ref |
| Life satisfaction (L - 1) | 0.74 [0.59, 0.94] | 0.83 [0.60, 1.15] | 0.87 [0.74, 1.01] | Ref |
| Ever diagnosed with Anxiety/Panic attack: Yes (Ref = No) | 0.21 [0.05, 0.80] | 0.57 [0.06, 5.73] | 0.70 [0.32, 1.56] | Ref |
| Ever diagnosed with Depression: Yes (Ref = No) | 0.94 [0.32, 2.71] | 0.38 [0.06, 2.23] | 0.57 [0.29, 1.12] | Ref |
| BMI: ≥25kg/m2 (Ref = <25kg/m2) | 2.28 [0.99, 5.28] | 3.23 [1.18, 8.85] | 1.78 [1.20, 2.63] | Ref |
| N (complete cases) = 925 | | | | | |

Table 13 - Odds ratios and 95% confidence intervals from **multinomial logistic regression** comparing membership in the consistently lower scores latent class with other classes associated with covariates from the **Follow-up 1 – after selection**

| Collection time | PHQ-st trajectories’ classes  Covariate | 1: High (n= 85, 9.2%) | 2: Peak-recovery  (n= 25, 2.7%) | 3: Intermediate (n= 539, 58.3%) | 4: Low (n= 276, 29.8%) |
| --- | --- | --- | --- | --- | --- |
| OR [95% CI] | | | |
| Baseline | Age in January 2019a | 0.94 [0.90, 0.97] | 0.96 [0.92, 1.01] | 0.95 [0.94, 0.97] | Ref |
| BIG 5 Agreeableness score | 0.71 [0.49, 1.03] | 0.50 [0.33, 0.76] | 0.89 [0.74, 1.08] | Ref |
| PHQ-st at baseline | 1.94 [1.68, 2.24] | 0.99 [0.77, 1.26] | 1.36 [1.23, 1.50] | Ref |
| FU1 | Depressive symptoms score (PHQ-9) | 1.36 [1.15, 1.62] | 1.33 [1.06, 1.66] | 1.22 [1.09, 1.37] | Ref |
| Anxiety symptoms score (GAD-7) | 1.87 [1.56, 2.24] | 1.24 [0.94, 1.62] | 1.39 [1.22, 1.58] | Ref |
| Health-related quality of life (SF36 - 1 item) | 3.79 [2.05, 6.99] | 1.13 [0.51, 2.49] | 1.84 [1.32, 2.57] | Ref |
| Employment at FU1 | | | | |
| Yes (Ref = No) | 5.54 [1.69, 18.13] | 5.06 [0.94, 27.20] | 1.15 [0.70, 1.89] | Ref |
| Divorced at FU1 | | | | |
| Yes (Ref = No) | 2.43 [0.83, 7.16] | 4.87 [1.71, 13.87] | 1.55 [0.88, 2.73] | Ref |
| Ever diagnosed with Anxiety/Panic attack | | | | |
| Yes (Ref = No) | 0.22 [0.06, 0.72] | 0.44 [0.05, 3.86] | 0.55 [0.26, 1.16] | Ref |
| BMI | | | | |
| ≥25kg/m2 (Ref = <25kg/m2) | 2.11 [0.97, 4.58] | 2.52 [1.01, 6.28] | 1.74 [1.19, 2.53] | Ref |
| a calculated from month and year of birth collected at baseline  Abbreviations: BMI, body mass index; FU1, 1st follow-up examination; GAD-7, the Generalised Anxiety Disorder-7 screener; kg, kilogram; n, number of participants; m, meter; PHQ-9, the Patient Health Questionnaire; PHQ-st, the Patient Health Questionnaire - stress module; ref, reference;  Scores ranges:   - Ascending order: Big-5 agreeableness: 1 to 7; GAD-7: 0 to 21; number of fears at CO1: 0 to 8; L-1: 1 to 11; Loneliness: 3 to 9; PHQ-9: 0 to 27; PHQ-st: 0 to 20; - Descending order: SF36-1 item: 1 (excellent) to 5 (poor)   Nagelkerke’s R2 = 0.5554; AIC: 1298.913; N (complete cases) = 925 | | | | | |

Table 14 - Odds ratios and 95% confidence intervals from **multivariable multinomial logistic** regression comparing membership in the consistently lower scores latent class with other classes associated with covariates from the **Baseline, FU1 and CO1 – before selection**

|  | PHQ-st trajectories’ classes  Covariate | 1: High (n= 85, 9.2%) | 2: Peak-recovery  (n= 25, 2.7%) | 3: Intermediate (n= 539, 58.3%) | 4: Low (n= 276, 29.8%) |
| --- | --- | --- | --- | --- | --- |
| OR [95% CI] | | | |
| Baseline | Female sex (ref = Male sex) | 0.92 [0.37, 2.30] | 0.79 [0.25, 2.52] | 1.16 [0.77, 1.75] | Ref |
| Age in January 2019a | 0.97 [0.92, 1.02] | 0.95 [0.89, 1.03] | 0.97 [0.94, 0.99] | Ref |
| PHQ-st at baseline | 2.02 [1.71, 2.39] | 0.83 [0.61, 1.12] | 1.39 [1.25, 1.55] | Ref |
| BIG 5 Neuroticism score | 0.88 [0.61, 1.27] | 1.29 [0.81, 2.03] | 0.88 [0.73, 1.05] | Ref |
| BIG 5 Agreeableness score | 0.73 [0.48, 1.10] | 0.35 [0.20, 0.62] | 0.84 [0.68, 1.05] | Ref |
| BIG 5 Extraversion score | 1.27 [0.92, 1.75] | 0.88 [0.58, 1.34] | 1.07 [0.90, 1.26] | Ref |
| BIG 5 Consciousness score | 0.83 [0.53, 1.32] | 1.51 [0.76, 2.99] | 1.02 [0.81, 1.30] | Ref |
| BIG 5 Openness score | 0.81 [0.58, 1.14] | 1.58 [1.02, 2.47] | 0.95 [0.80, 1.12] | Ref |
| Childhood trauma score (CTS) | 1.12 [0.95, 1.32] | 1.08 [0.88, 1.33] | 1.00 [0.91, 1.11] | Ref |
| International socio-economic index | 0.99 [0.96, 1.03] | 0.99 [0.95, 1.04] | 1.00 [0.99, 1.02] | Ref |
| Social network index (SNI) | 0.98 [0.54, 1.80] | 1.09 [0.47, 2.53] | 1.17 [0.86, 1.58] | Ref |
| German is a mother tongue: Yes (Ref = No) | 0.45 [0.01, 13.42] | 0.09 [0.00, 1.64] | 0.30 [0.08, 1.17] | Ref |
| FU1 | Education in years (ISCED97) | 1.05 [0.81, 1.35] | 0.73 [0.54, 0.98] | 0.98 [0.87, 1.10] | Ref |
| Number of children under 14y in the household | 1.07 [0.50, 2.29] | 0.31 [0.11, 0.87] | 1.00 [0.67, 1.51] | Ref |
| Divorced: Yes (Ref = No) | 2.78 [0.71, 10.86] | 17.00 [3.22, 89.62] | 1.57 [0.78, 3.15] | Ref |
| Married living together: Yes (Ref = No) | 0.60 [0.20, 1.82] | 4.76 [0.97, 23.44] | 0.69 [0.40, 1.17] | Ref |
| Not having a partner: Yes (Ref = No) | 0.24 [0.06, 0.94] | 0.88 [0.16, 4.96] | 0.53 [0.29, 0.99] | Ref |
| Health-related quality of life (SF36- 1 item) | 3.06 [1.52, 6.13] | 1.03 [0.40, 2.67] | 1.81 [1.26, 2.60] | Ref |
| Life satisfaction (L-1) | 0.73 [0.57, 0.93] | 0.74 [0.52, 1.07] | 0.87 [0.74, 1.02] | Ref |
| Depressive symptoms score (PHQ-9) | 1.41 [1.16, 1.71] | 1.35 [1.03, 1.76] | 1.26 [1.11, 1.43] | Ref |
| Anxiety symptoms score (GAD-7) | 1.82 [1.47, 2.25] | 1.09 [0.79, 1.50] | 1.37 [1.19, 1.57] | Ref |
| Ever diagnosed with Anxiety/Panic attack until FU1: Yes (Ref = No) | 0.25 [0.06, 1.07] | 1.15 [0.11, 11.93] | 0.84 [0.36, 1.96] | Ref |
| Ever diagnosed with Depression until FU1: Yes (Ref = No) | 0.82 [0.26, 2.61] | 0.28 [0.04, 1.95] | 0.55 [0.27, 1.12] | Ref |
| BMI: ≥25kg/m2 (Ref = <25kg/m2) | 2.22 [0.99, 5.47] | 3.71 [1.21, 11.40] | 1.85 [1.23, 2.80] | Ref |
| CO1 | Employment: Yes (Ref = No) | 6.59 [1.73, 25.04] | 9.84 [0.94, 103.15] | 1.51 [0.87, 2.64] | Ref |
| Single parents | 2.51 [0.25, 25.49] | 8.73 [0.75, 93.44] | 1.55 [0.38, 6.27] | Ref |
| Living with partner and young child(ren) | 3.27 [0.87, 12.29] | 9.77 [2.10, 45.35] | 1.13 [0.55, 2.33] | Ref |
| Number of fears | 1.23 [1.04, 1.45] | 1.15 [0.93, 1.42 ] | 1.09 [1.00, 1.19] | Ref |
| Loneliness score | 1.83 [1.40, 2.39] | 1.35 [0.94, 1.88] | 1.16 [1.01, 1.35] | Ref |
| Household finances difficulties (ref = no difficulties) | 2.36 [0.69, 8.08] | 1.04 [0.16, 6.74] | 1.87 [0.80, 4.36] | Ref |
| Decreased activities getting around (ref = no change or increased) | 0.88 [0.33, 2.31] | 2.09 [0.54, 8.05] | 1.16 [0.71, 1.88] | Ref |
| Decreased leisure activities (ref = no change or increased) | 2.11 [0.74, 5.98] | 1.49 [0.39, 5.74] | 1.50 [0.91, 2.47] | Ref |
| Increased activities in the household (ref = no change or increased) | 1.09 [0.43, 2.76] | 7.16 [1.98, 25.92] | 1.16 [0.70, 1.91] | Ref |
| Increased seated activities (ref = no change or increased) | 1.02 [0.41, 2.57] | 0.47 [0.12, 1.78] | 1.08 [0.68, 1.73] | Ref |
| Decreased sport activities (ref = no change or increased) | 1.98 [0.84, 4.65] | 2.36 [0.79, 7.06] | 1.33 [0.88, 2.00] | Ref |
| a calculated from month and year of birth collected at baseline: n (complete cases) = 925  Abbreviations: BMI, body mass index; FU1, 1st follow-up examination; GAD-7, the Generalised Anxiety Disorder-7 screener; kg, kilogram; n, number of participants; m, meter; PHQ-9, the Patient Health Questionnaire; PHQ-st, the Patient Health Questionnaire - stress module; ref, reference;  Scores ranges: Ascending order: Big-5 agreeableness: 1 to 7; GAD-7: 0 to 21; number of fears at CO1: 0 to 8; L-1: 1 to 11; Loneliness: 3 to 9; PHQ-9: 0 to 27; PHQ-st: 0 to 20; SNI: 1 ‘social isolation’ to 4; Descending order: SF36-1 item: 1 (excellent) to 5 (poor) | | | | | |
